# Supplementary material for: Insights into short- and long-term effects of loading nickel nanoparticles on anaerobic digestion with flocculent sludge
Source: Royal Society of Chemistry journal article supplement (doi:10.1039/c9en00628a), 2019-01-01
Supplement: c9en00628a1.pdf [file c9en00628a1.pdf]

## Supporting Information

### **Insights into short- and long-term effects of loading nickel nanoparticles on anaerobic digestion with flocculent sludge**

Chuan-Shu He, Rong-Rong Ding, Yi-Ran Wang, Qi Li, Yi-Xuan Wang, Yang Mu\*

CAS Key Laboratory of Urban Pollutant Conversion, Collaborative Innovation Centre  
of Suzhou Nano Science and Technology, Department of Applied Chemistry,  
University of Science and Technology of China, Hefei, China

\*Corresponding author:

**Prof. Yang Mu**, E-mail address: [yangmu@ustc.edu.cn](mailto:yangmu@ustc.edu.cn)

### Methods and Materials:

Zero-, first- and second-order reaction kinetics were used to model glucose degradation for the AFS in anaerobic digestion at various Ni-NPs concentrations. The individual kinetic model is presented as below:

$$C_t = C_0 - k_0 t \quad (1)$$

$$C_t = C_0 e^{-k_1 t} \quad (2)$$

$$\frac{1}{C_t} = \frac{1}{C_0} + k_2 t \quad (3)$$

where  $C_t$  (mg/L) is the glucose concentration at time  $t$  (d),  $C_0$  (mg/L) is the initial glucose concentration, and  $k_0$ ,  $k_1$  and  $k_3$  represent the apparent kinetic rate constants of zero-, first- and second-order reaction kinetics, respectively.

Regression coefficients ( $R^2$ ) of glucose degradation for the AFS with exposure to different concentrations of Ni-NPs, as fitted by zero-, first-, and second-order kinetics, are summarized in Table S1.

**Table S1** Regression coefficients of glucose degradation for the AFS with exposure to different concentrations of Ni-NPs, as fitted by zero-, first-, and second-order kinetics.

| Experiments            | Cycle | R <sup>2</sup> |             |              |
|------------------------|-------|----------------|-------------|--------------|
|                        |       | Zero-order     | First-order | Second-order |
| Control                | 1     | 0.90           | 0.74        | 0.60         |
|                        | 2     | 0.93           | 0.78        | 0.60         |
|                        | 3     | 1.00           | 0.86        | 0.70         |
|                        | 4     | 0.98           | 0.91        | 0.69         |
| 1 mg/g-TSS<br>Ni-NPs   | 1     | 0.94           | 0.74        | 0.61         |
|                        | 2     | 0.93           | 0.71        | 0.57         |
|                        | 3     | 0.98           | 0.77        | 0.57         |
|                        | 4     | 0.98           | 0.87        | 0.75         |
| 50 mg/g-TSS<br>Ni-NPs  | 1     | 0.94           | 0.72        | 0.61         |
|                        | 2     | 0.94           | 0.58        | 0.79         |
|                        | 3     | 0.90           | 0.69        | 0.55         |
|                        | 4     | 0.94           | 0.91        | 0.78         |
| 200 mg/g-TSS<br>Ni-NPs | 1     | 0.93           | 0.74        | 0.65         |
|                        | 2     | 0.89           | 0.78        | 0.47         |
|                        | 3     | 0.94           | 0.86        | 0.49         |
|                        | 4     | 0.92           | 0.91        | 0.51         |
| 600 mg/g-TSS<br>Ni-NPs | 1     | 0.91           | 0.98        | 0.97         |
|                        | 2     | 0.93           | 0.82        | 0.65         |
|                        | 3     | 0.89           | 0.62        | 0.67         |
|                        | 4     | 0.96           | 0.76        | 0.72         |

**Table S2** Comparison of the richness and diversity of the 16S rRNA gene libraries based on 0.03 distance

|                         | OTUs | Shannon Diversity | Chao 1 richness estimation | Goods coverage (%) |
|-------------------------|------|-------------------|----------------------------|--------------------|
| AFS-Control             | 481  | 5.635             | 524                        | 99.9               |
| AFS-600 mg/g-TSS Ni NPs | 416  | 4.776             | 444                        | 99.8               |

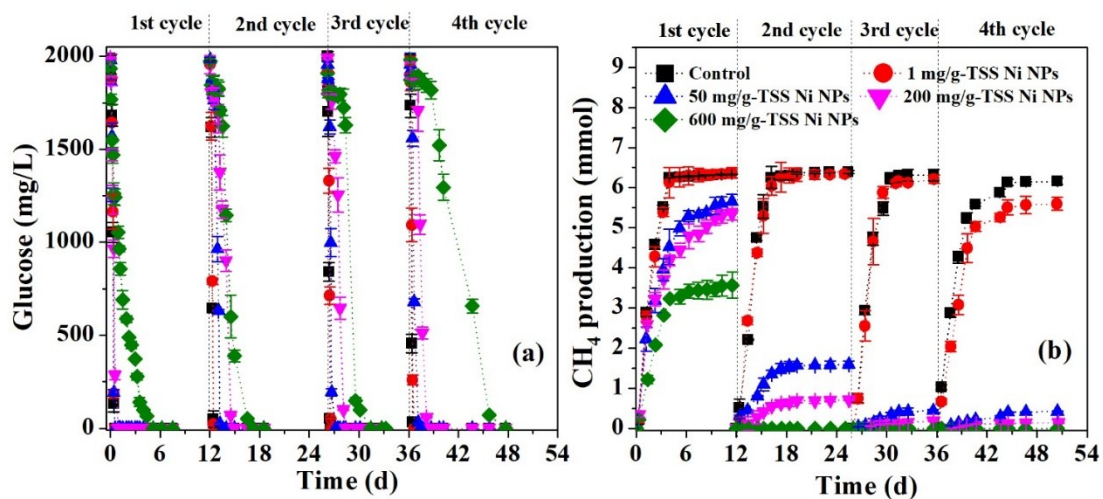

**Figure S1** Effect of Ni-NPs on the activity of the AFS during four cycles: (a) glucose degradation and (b) CH<sub>4</sub> production in the absence and presence of Ni-NPs. Error bars represent standard deviations of triplicate tests. Conditions were 2 g/L glucose, pH 7.3, 115 rpm and 35 °C.

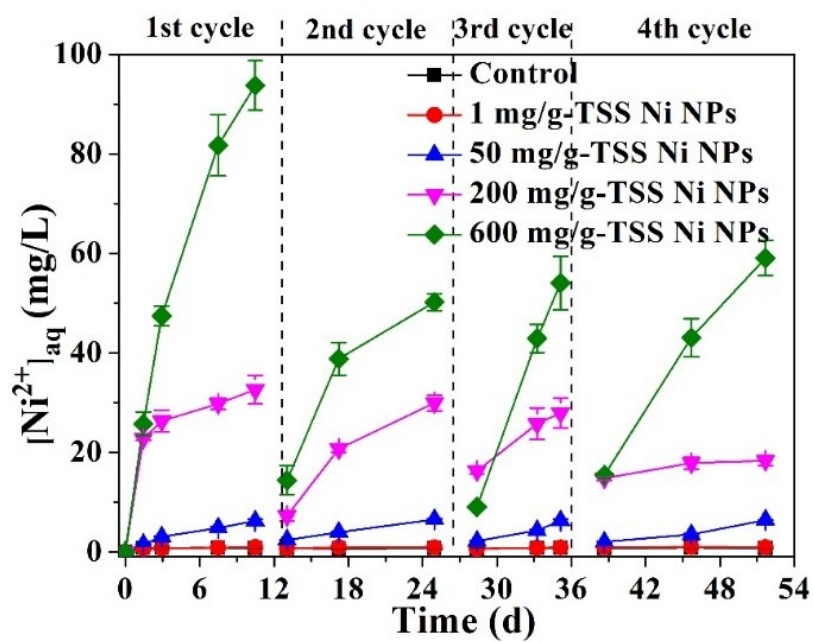

**Figure S2**  $\text{Ni}^{2+}$  released from Ni NPs in the AFS systems during four cycles. The time was recorded from the addition of Ni NPs. 2 g/L glucose, initial pH 7.3, 115 rpm, 35 °C.

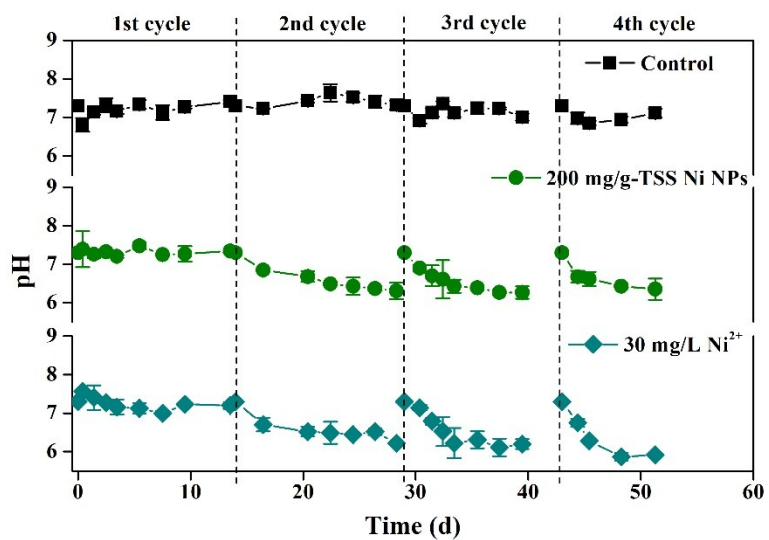

**Figure S3** pH variations in the AFS systems with and without Ni-NPs and Ni<sup>2+</sup> additions.
